# Supplementary material
Source: PubMed Central journal article supplement (PMC7611474)

A)

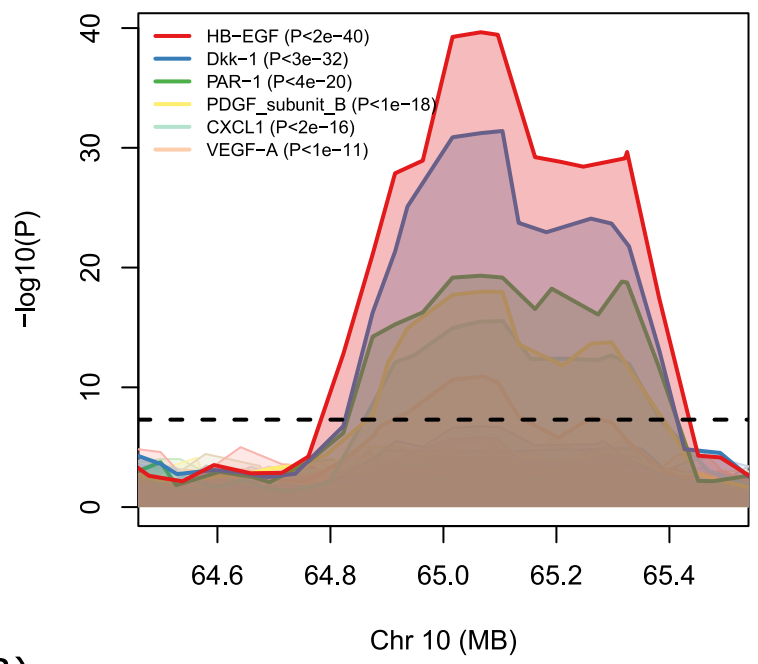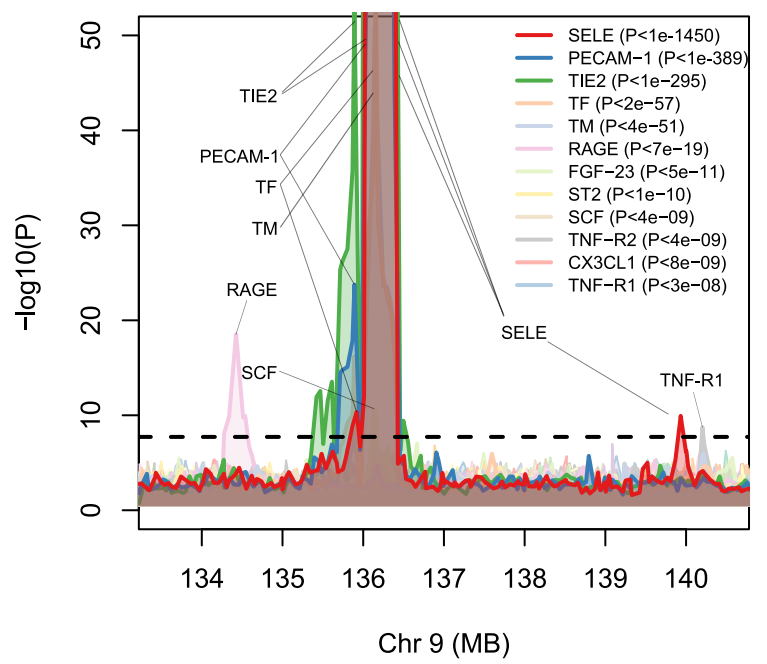

B)

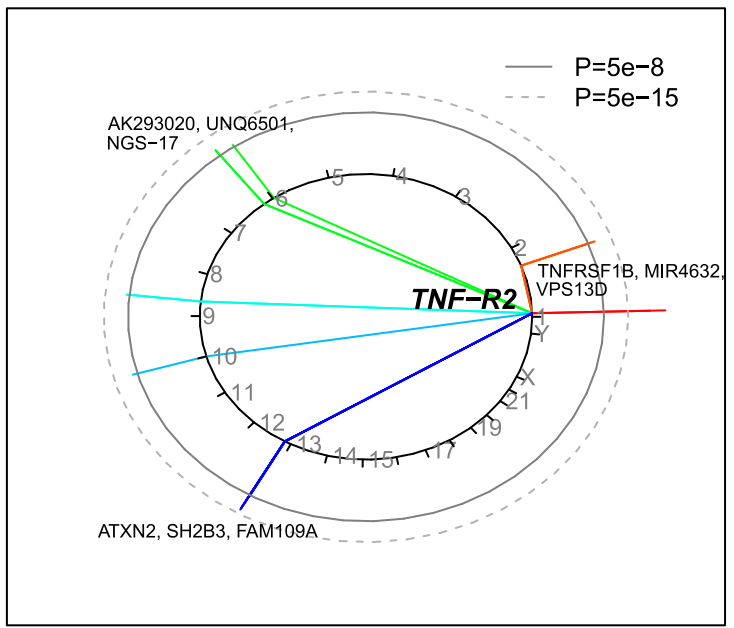

C)

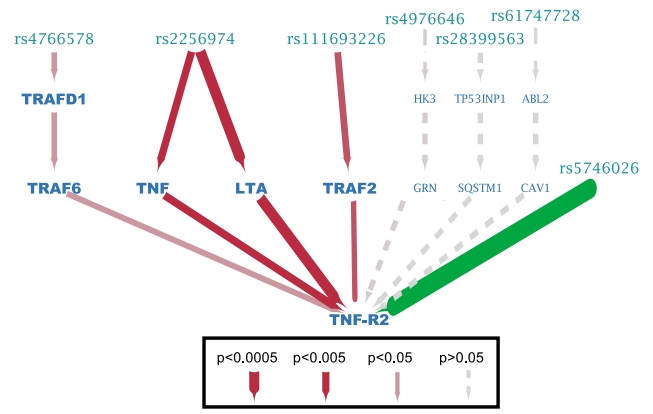

Supplement: EMS131454-supplement-Extended_figure_2.pdf [file EMS131454-supplement-Extended_figure_2.pdf]
