# Supplementary material
Source: PubMed Central journal article supplement (PMC7611474)
Supplement: EMS131454-supplement-Extended_figure_4.pdf [file EMS131454-supplement-Extended_figure_4.pdf]

**CCL3 (MIP-1-alpha)**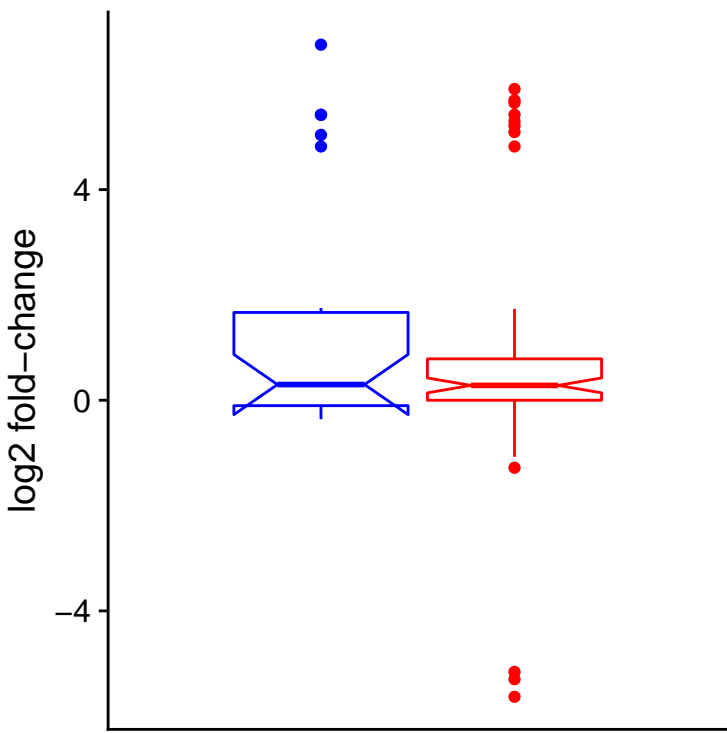

Treatment group ▢ Placebo ▢ PF-04634817

**CCL8 (MCP-2)**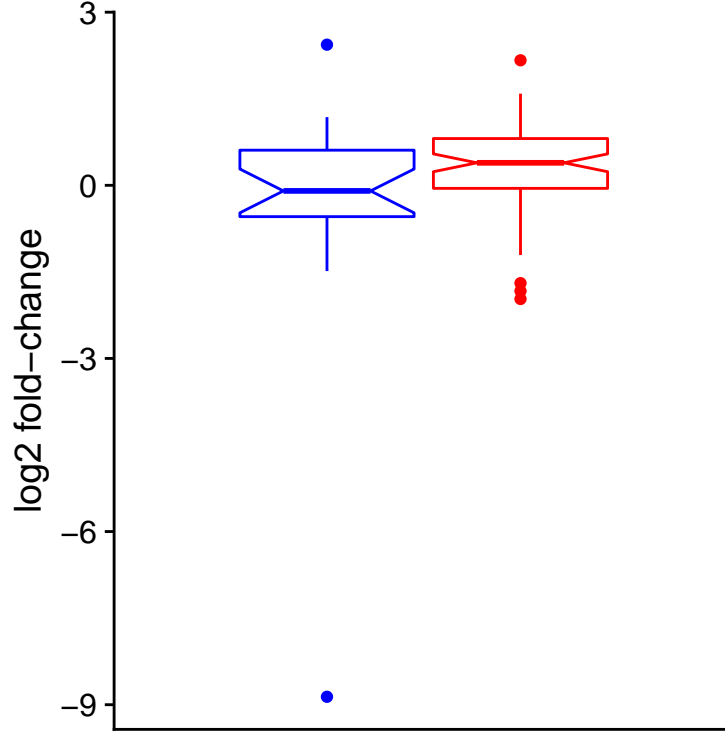

Treatment group ▢ Placebo ▢ PF-04634817

**EN-RAGE**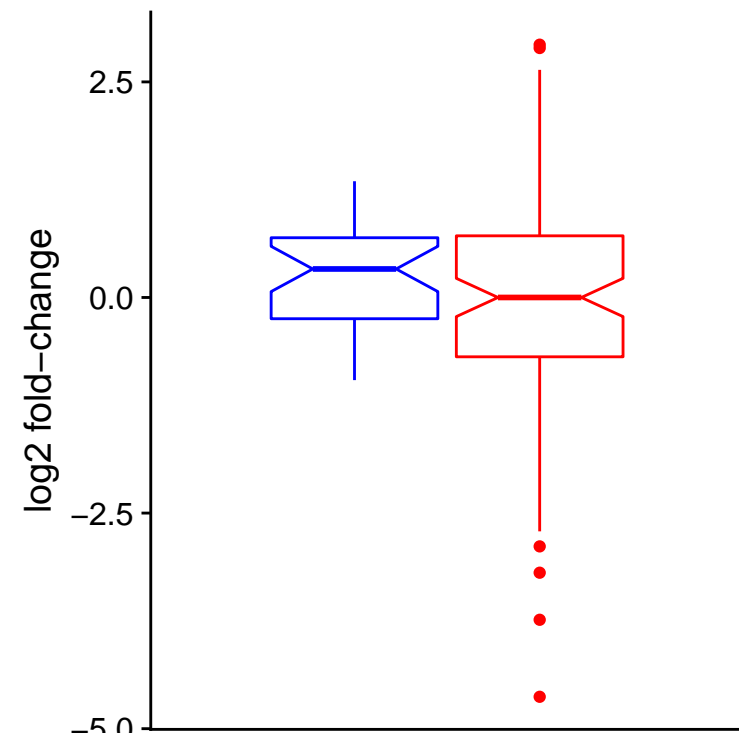

Treatment group ▢ Placebo ▢ PF-04634817

**FGF-23**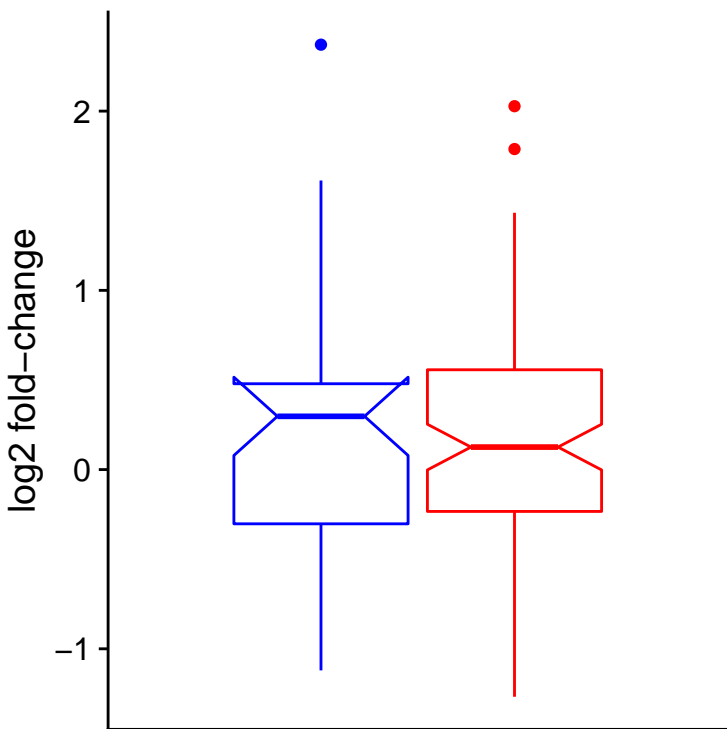

Treatment group ▢ Placebo ▢ PF-04634817

**KIM-1**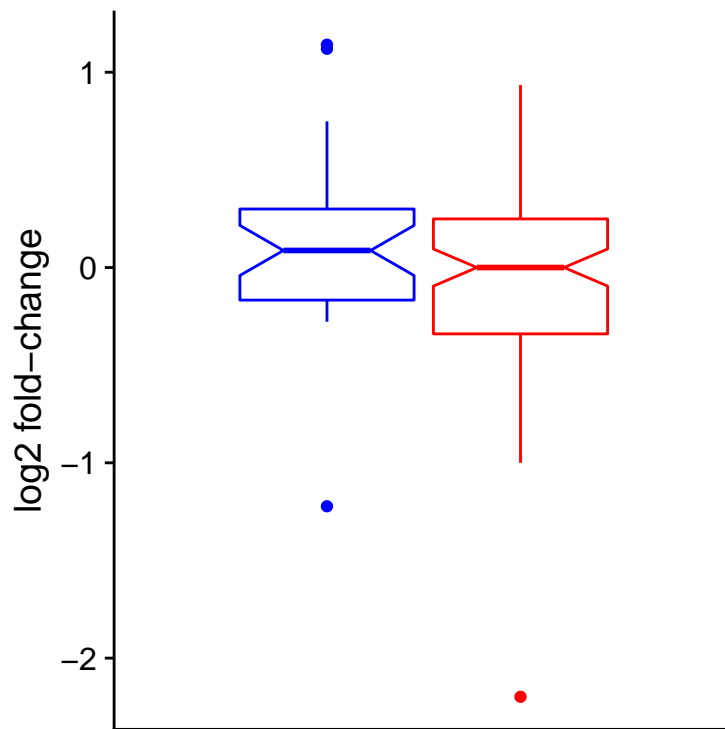

Treatment group ▢ Placebo ▢ PF-04634817

**Myoglobin**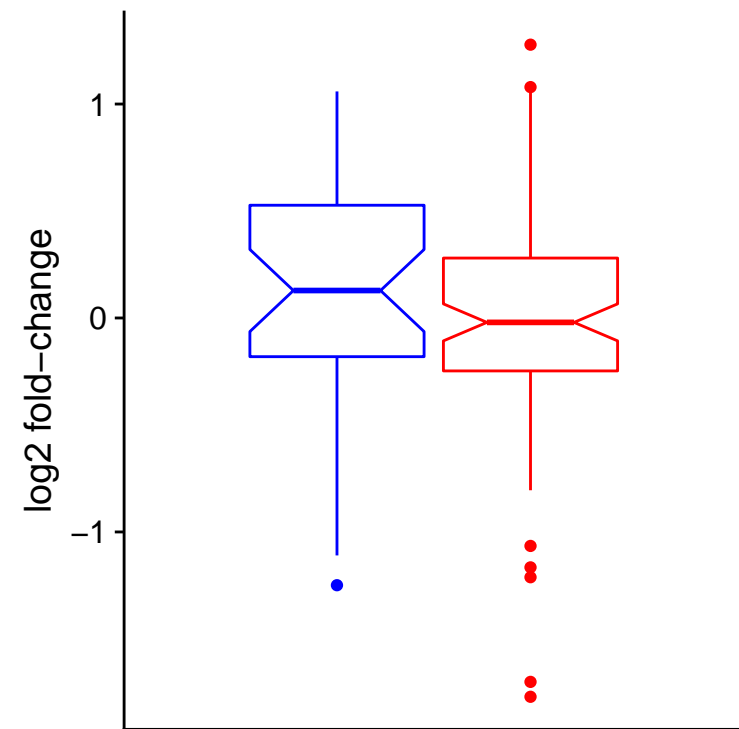

Treatment group ▢ Placebo ▢ PF-04634817

**CCL5 (RANTES)**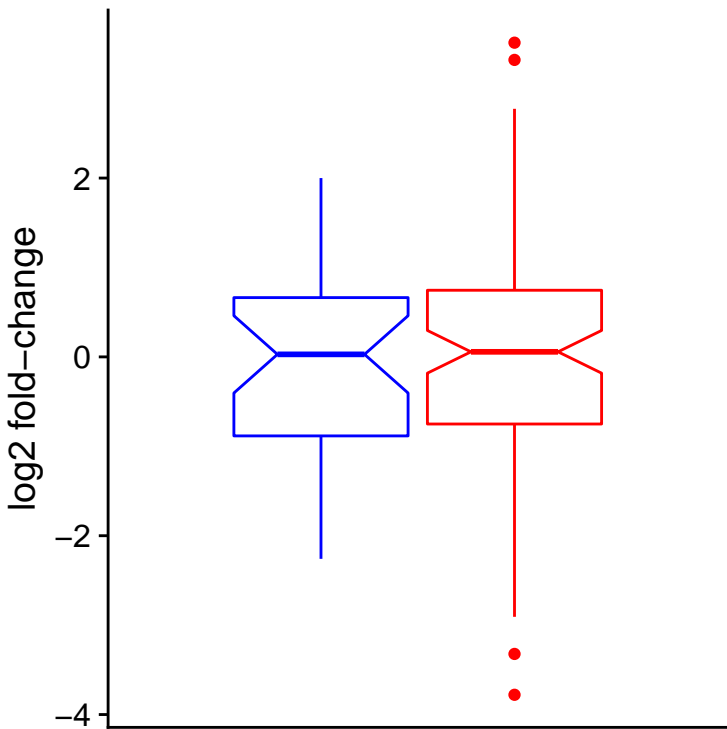

Treatment group ▢ Placebo ▢ PF-04634817

**TNFR-2**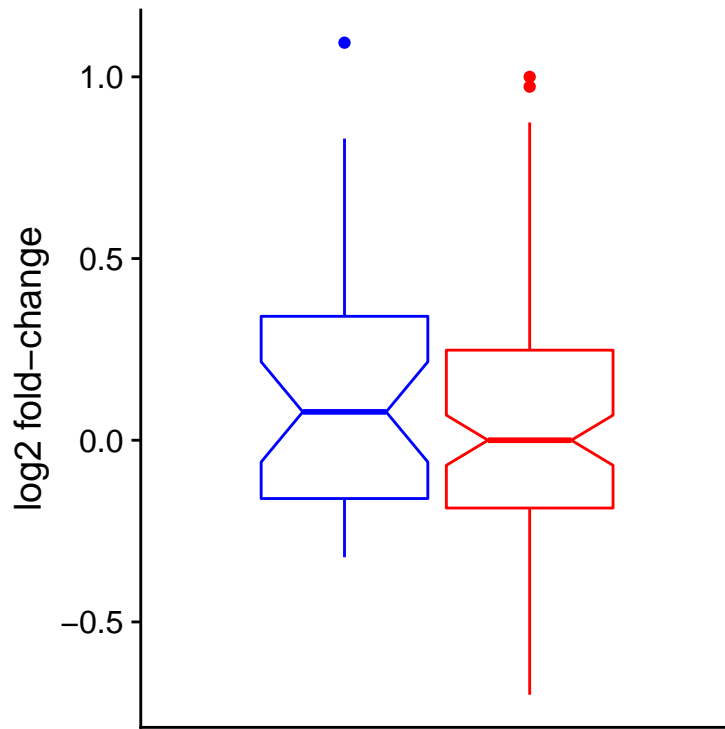

Treatment group ▢ Placebo ▢ PF-04634817
