# Supplementary material
Source: PubMed Central journal article supplement (PMC7611474)

Sumstats data  
freeze

SNP selection criteria

"Sentinel SNP"  $P < 5e-8$   
Pruned to  $\pm 1$  MB window

Table S2  
Primary hit  
 $n_{\text{SNP}} = 401$

*\*Criteria in next figure (7)*

Table S2  
Instrument  
variable selected  
 $n_{\text{SNP}} = 467$

Mendelian  
Randomization

GCTA-COJO  $P < 5e-8$   
Independent signal  $< 1$  MB

Table S2  
Secondary hit  
 $n_{\text{SNP}} = 144$

P-discovery  $< 5e-8$

Table S2  
Conventional  
significant  
 $n_{\text{SNP}} = 545$

Other downstream  
analyses; eQTL,  
systems biology

P-discovery+  
replication  $< 5.6e-10$

Table S2  
Bonferroni-  
Significant D+R  
 $n_{\text{SNP}} = 451$

Count of pQTLs

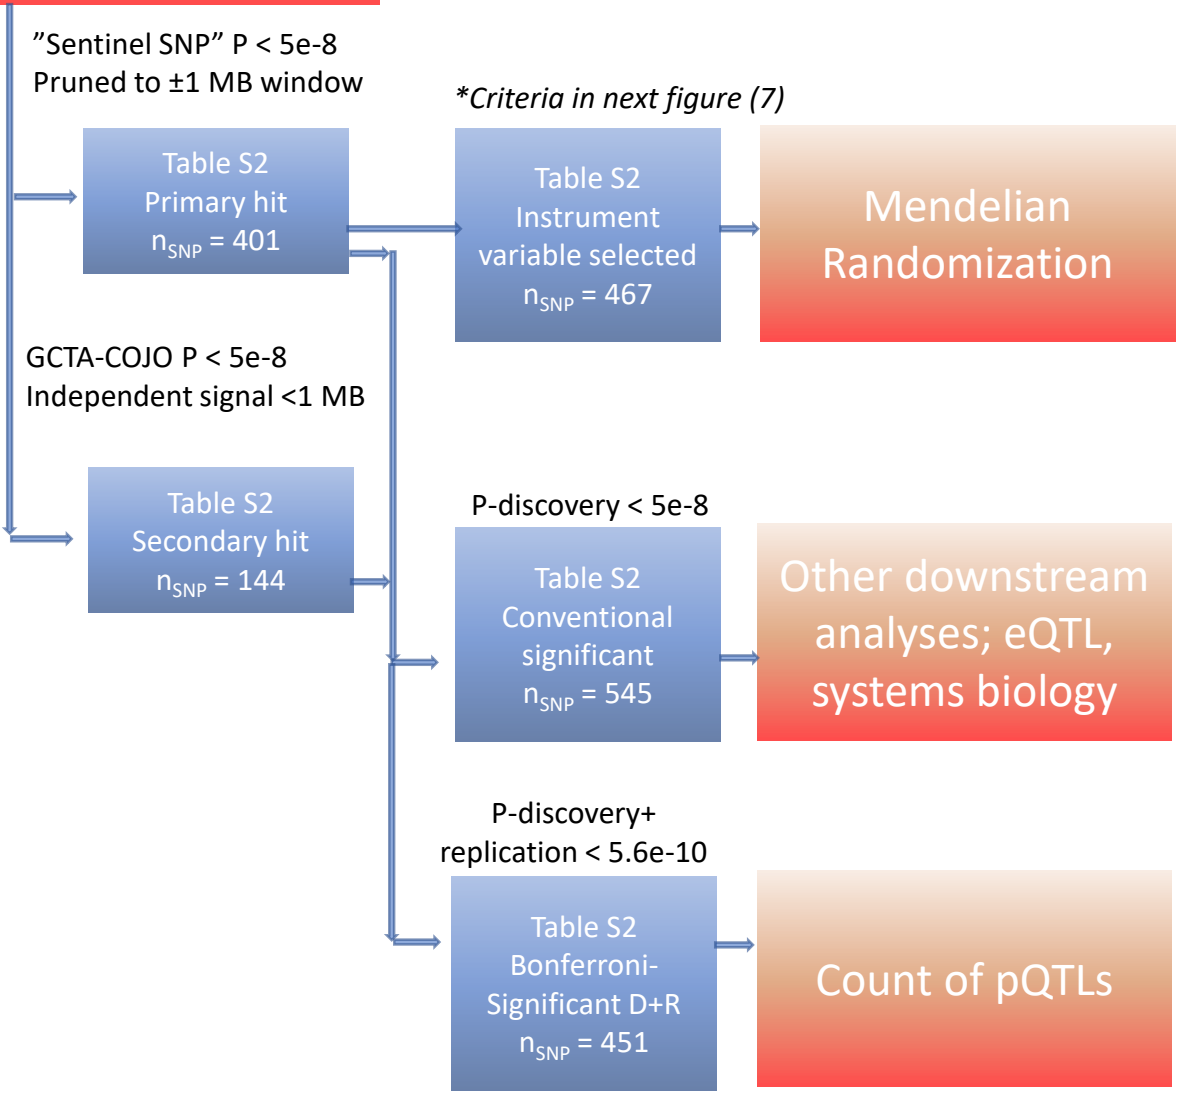

Supplement: EMS131454-supplement-Extended_figure_6.pdf [file EMS131454-supplement-Extended_figure_6.pdf]
