# Supplementary material
Source: PubMed Central journal article supplement (PMC7611474)

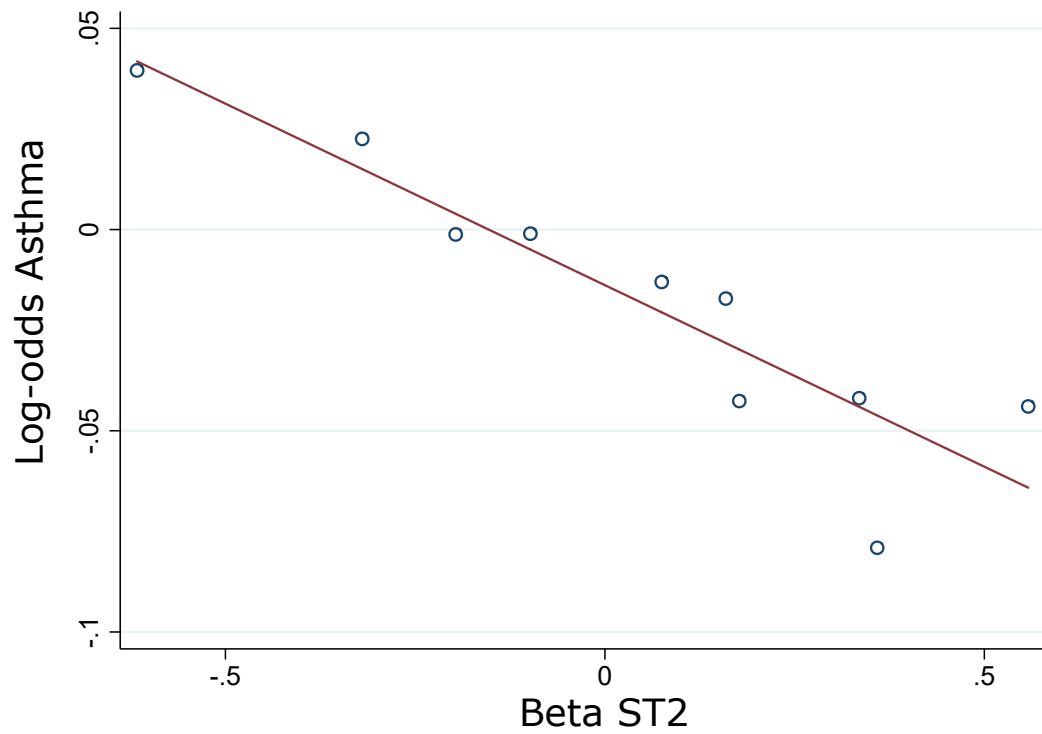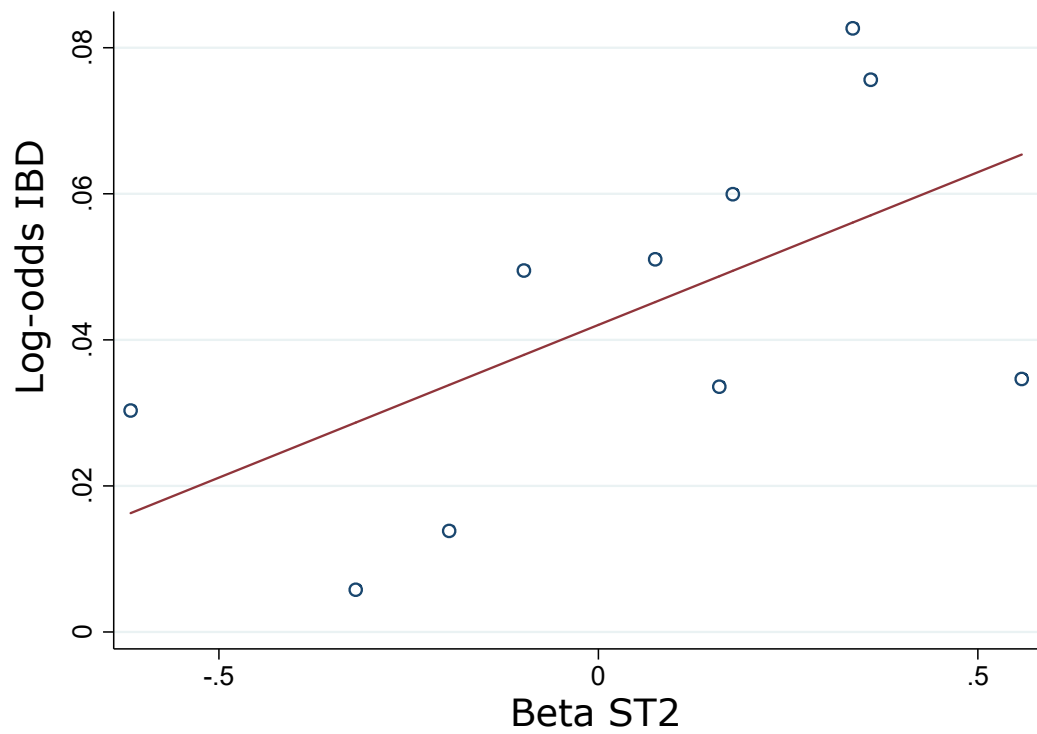

Supplement: EMS131454-supplement-Extended_figure_8.pdf [file EMS131454-supplement-Extended_figure_8.pdf]
