# Supplementary material
Source: PubMed Central journal article supplement (PMC7611474)

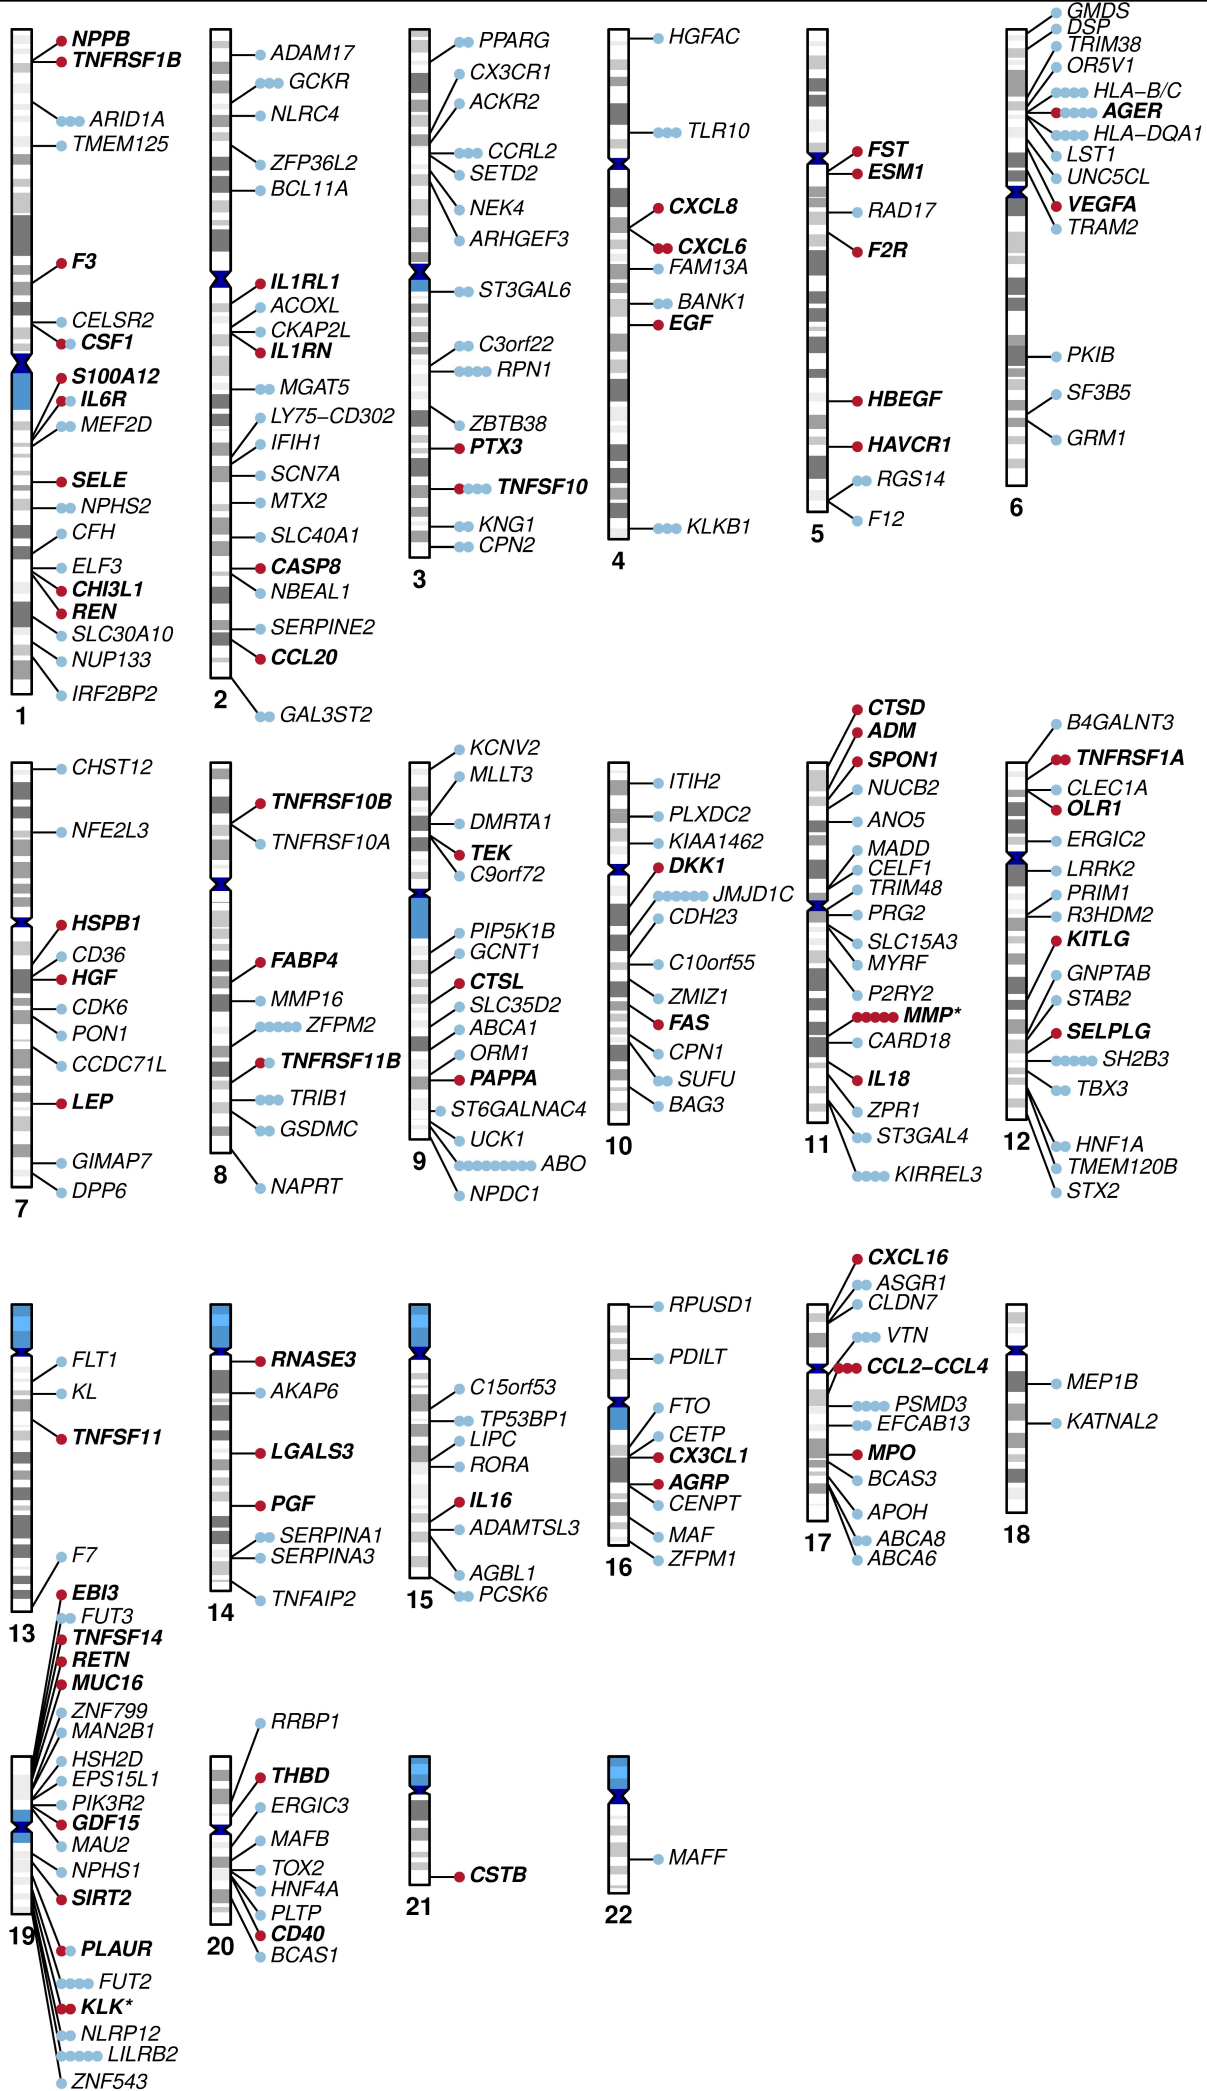

Supplement: EMS131454-supplement-Extended_figure_1.pdf [file EMS131454-supplement-Extended_figure_1.pdf]

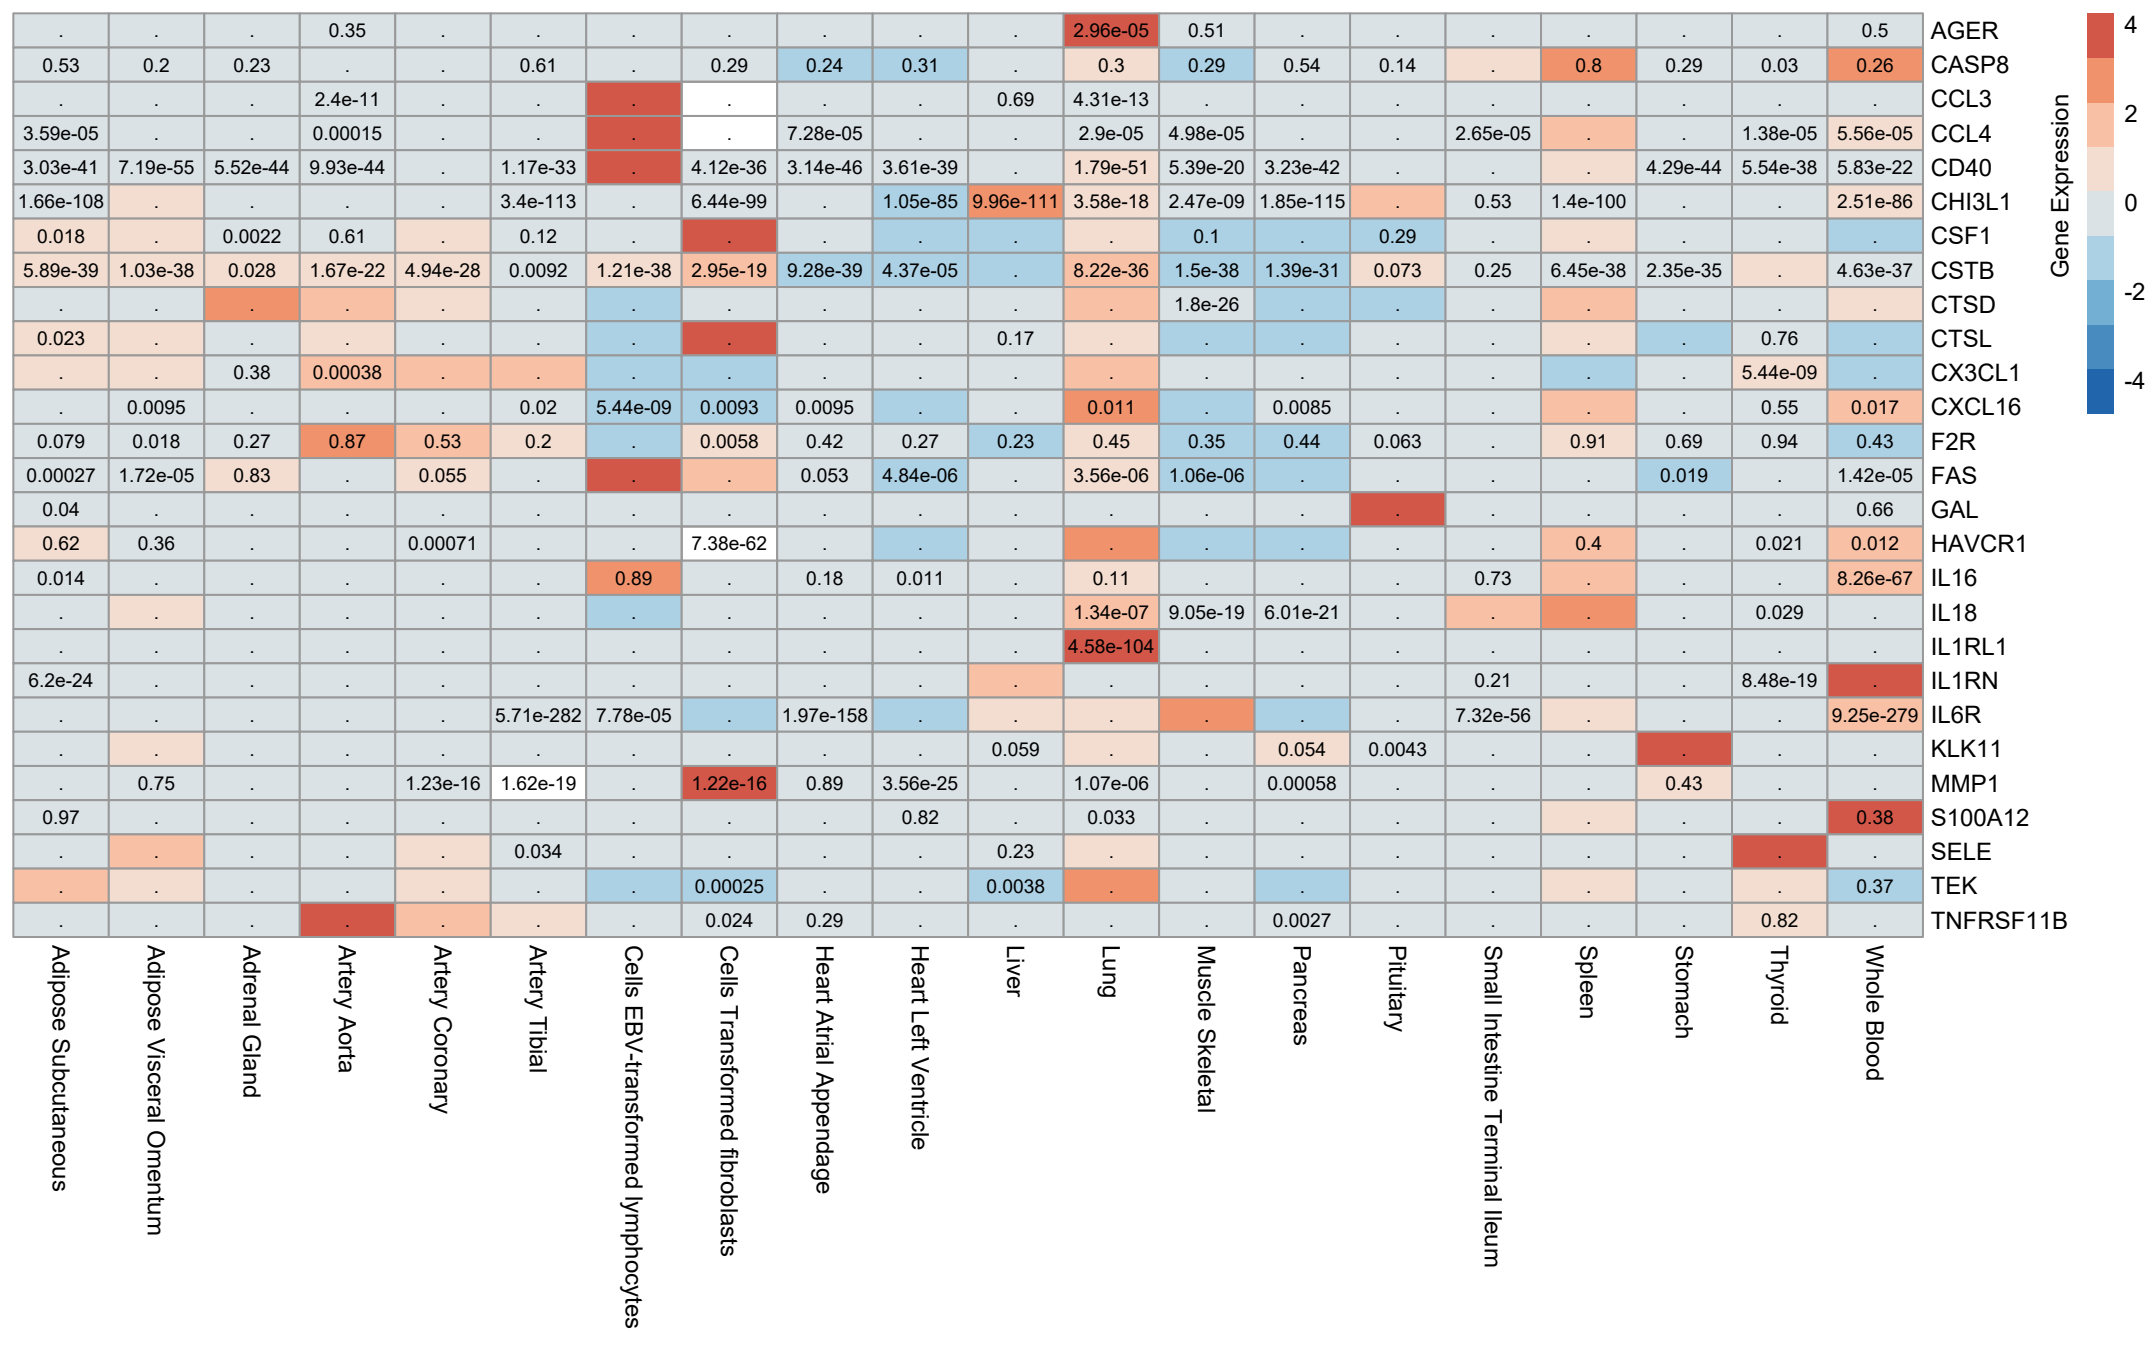

Supplement: EMS131454-supplement-Extended_figure_3.pdf [file EMS131454-supplement-Extended_figure_3.pdf]

A)

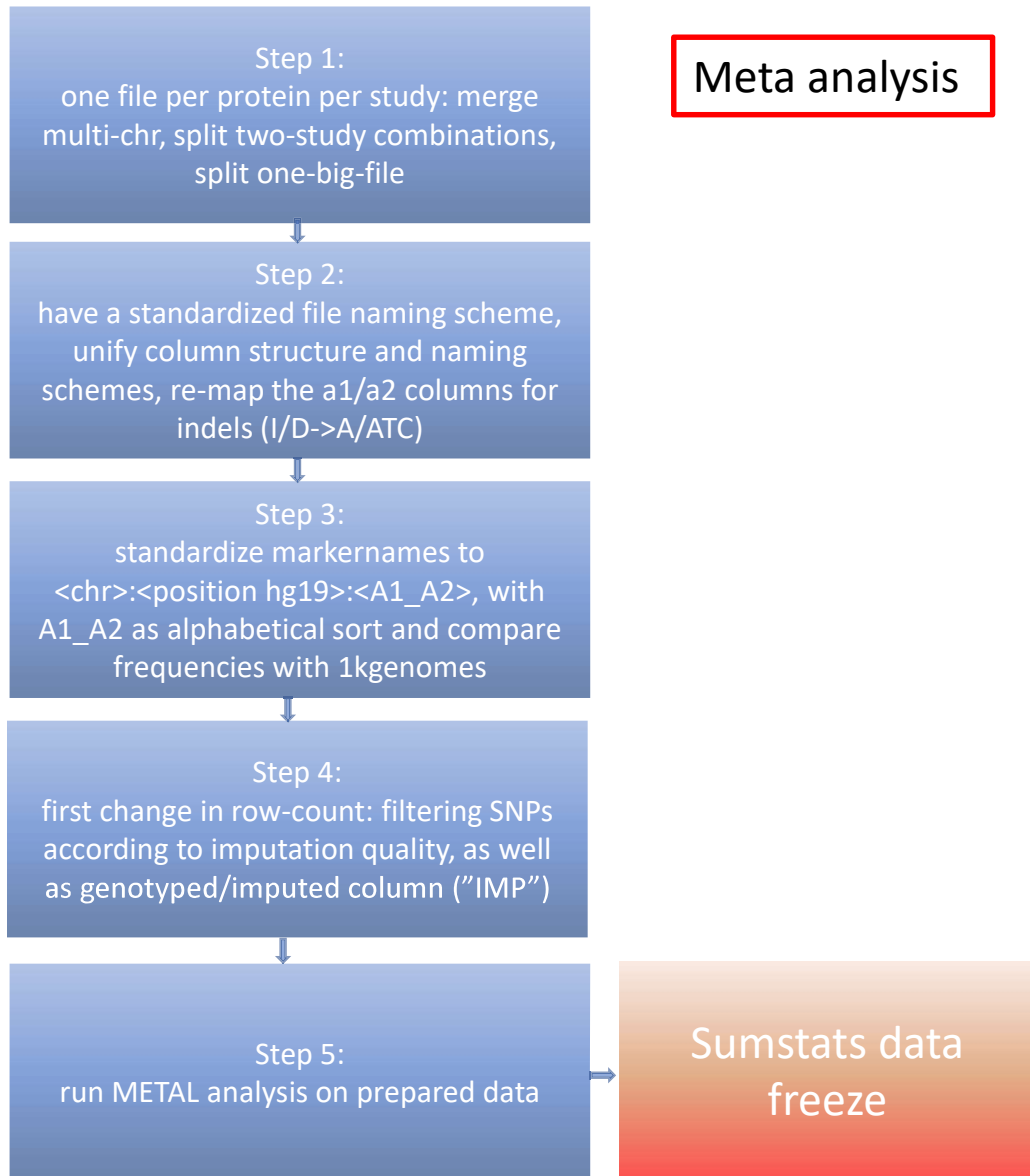

Supplement: EMS131454-supplement-Extended_figure_5.pdf [file EMS131454-supplement-Extended_figure_5.pdf]

c)

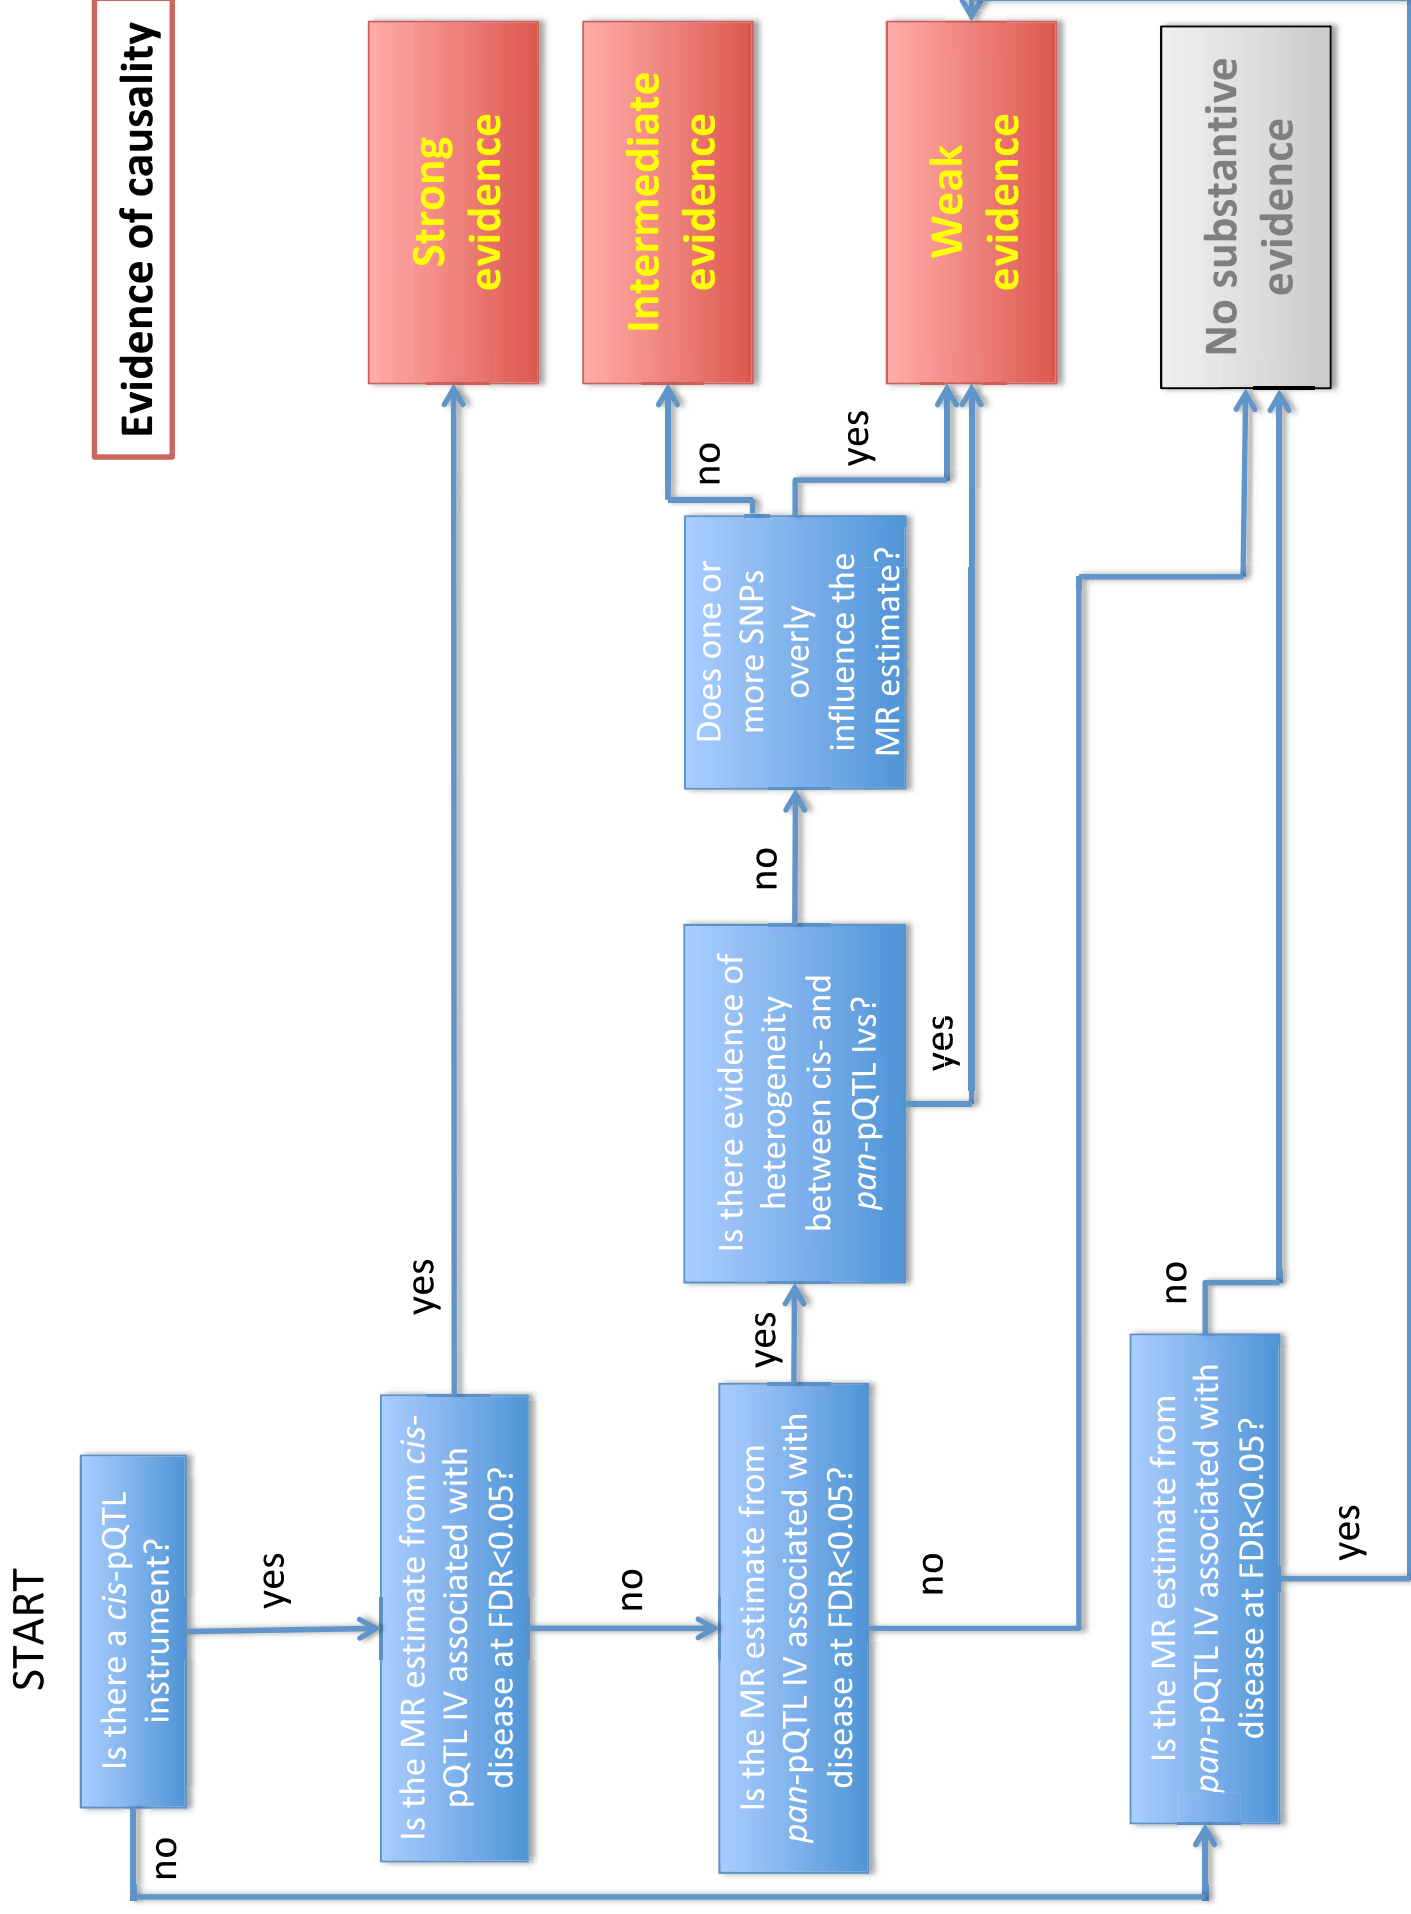

Supplement: EMS131454-supplement-Extended_figure_7.pdf [file EMS131454-supplement-Extended_figure_7.pdf]

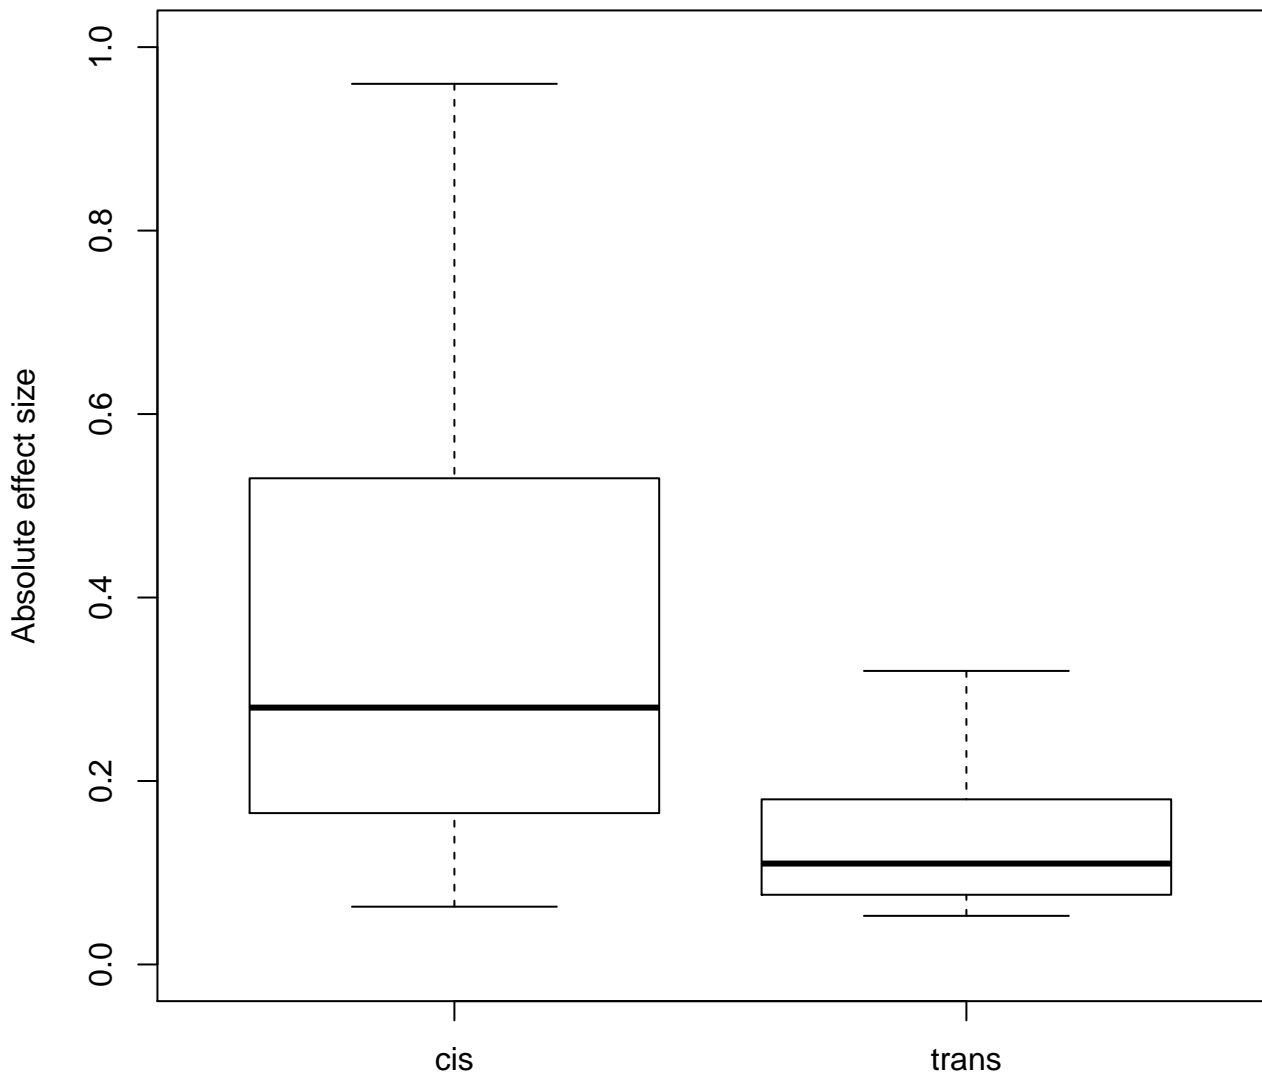

Supplement: EMS131454-supplement-Extended_figure_9.pdf [file EMS131454-supplement-Extended_figure_9.pdf]
